# Supplementary material for: Aerosol optical depth trend over the Middle East
Source: Copernicus journal article supplement (doi:10.5194/acp-2015-839), 2016-01-15
Supplement: Supplementary file [file acp-2015-839-AC2-supplement.pdf]

### Partial correlogram (MODIS AOD(550 nm), Saudi Arabia)

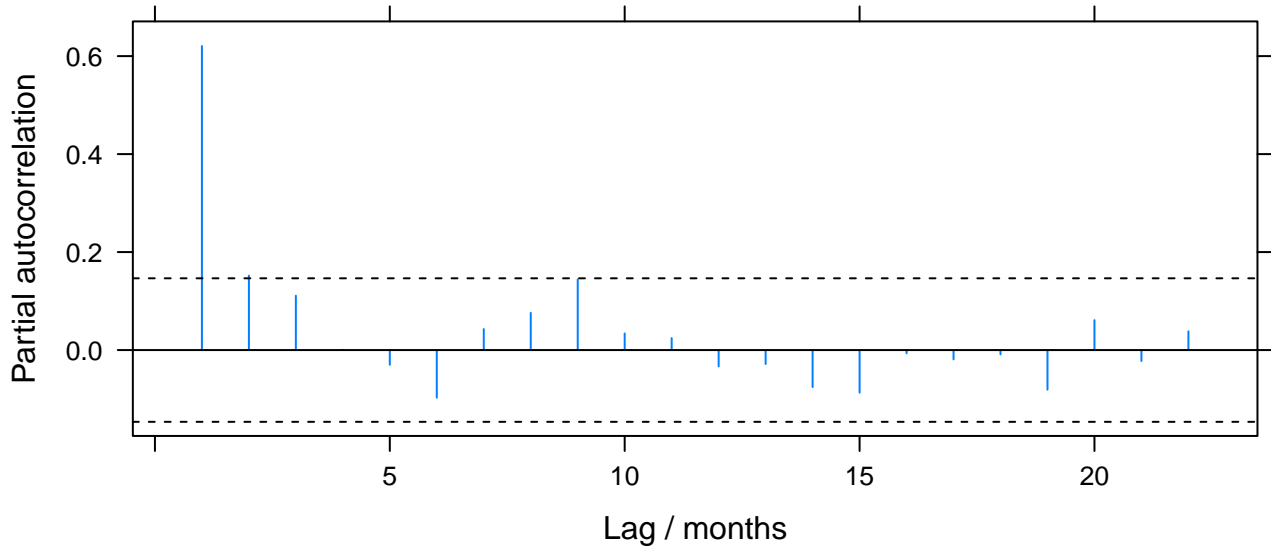

**Figure S31.** Partial correlogram of the deseasonalised MODIS AOD time series over Saudi Arabia in Fig. 3. The dashed lines represent the confidence limits for a significance level of 5%. Only the 1 month lag partial autocorrelation is unambiguously significant, suggesting that the time series follows an AR(1) process. The absence of a significant partial autocorrelation for a 12 month lag demonstrates the good performance of the deseasonalisation procedure.

### AR(1) residual correlogram (MODIS AOD(550 nm), Saudi Arabia)

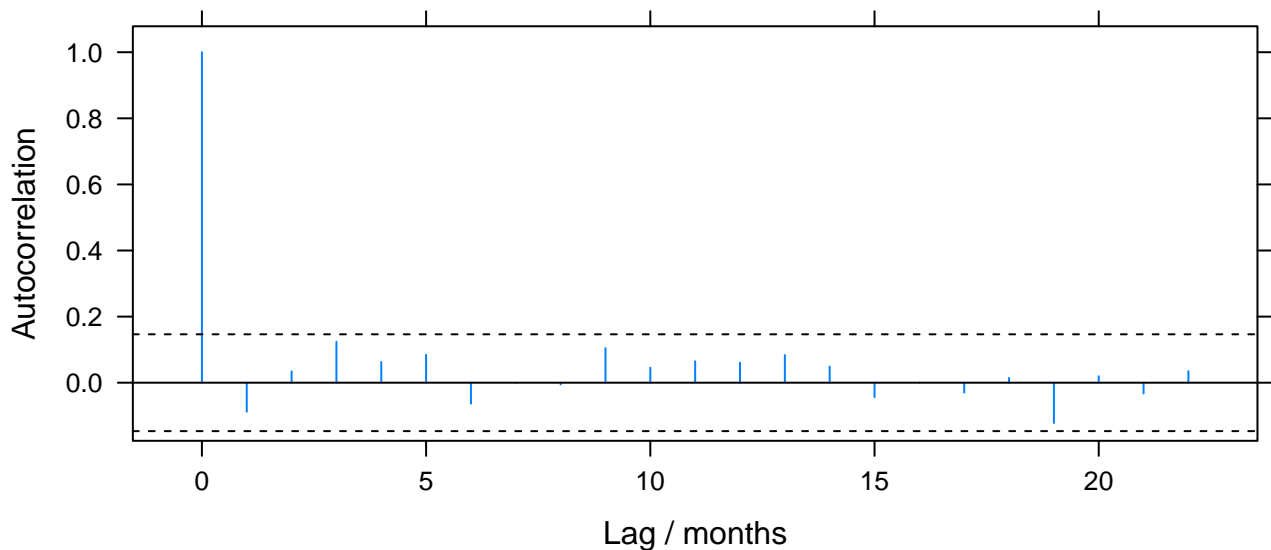

**Figure S32.** Correlogram for the residuals of the AR(1) model fitted to the deseasonalised MODIS AOD time series over Saudi Arabia in Fig. 3. The dashed lines represent the confidence limits for a significance level of 5%. No significant autocorrelations are found, providing evidence that the residuals are well approximated by white noise and that the AR(1) model yields a good approximation of the deseasonalised time series.

### Partial correlogram (AERONET AOD, Solar Village)

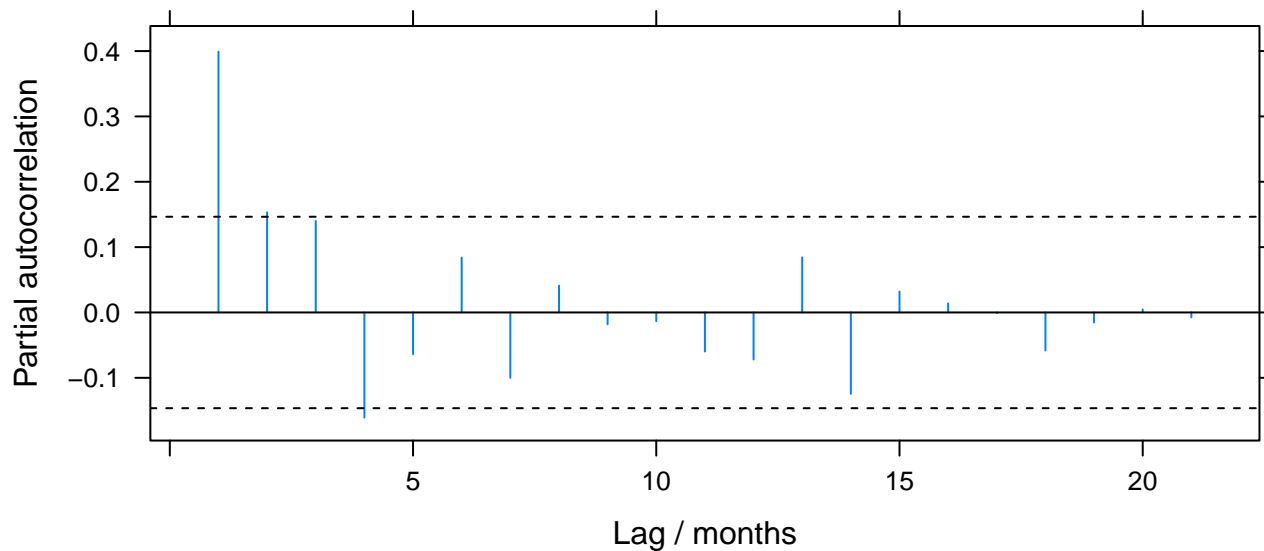

**Figure S33.** As Fig. S31, but for the AERONET AOD over Solar Village shown in Fig. 4.

### AR(1) residual correlogram (AERONET AOD, Solar Village)

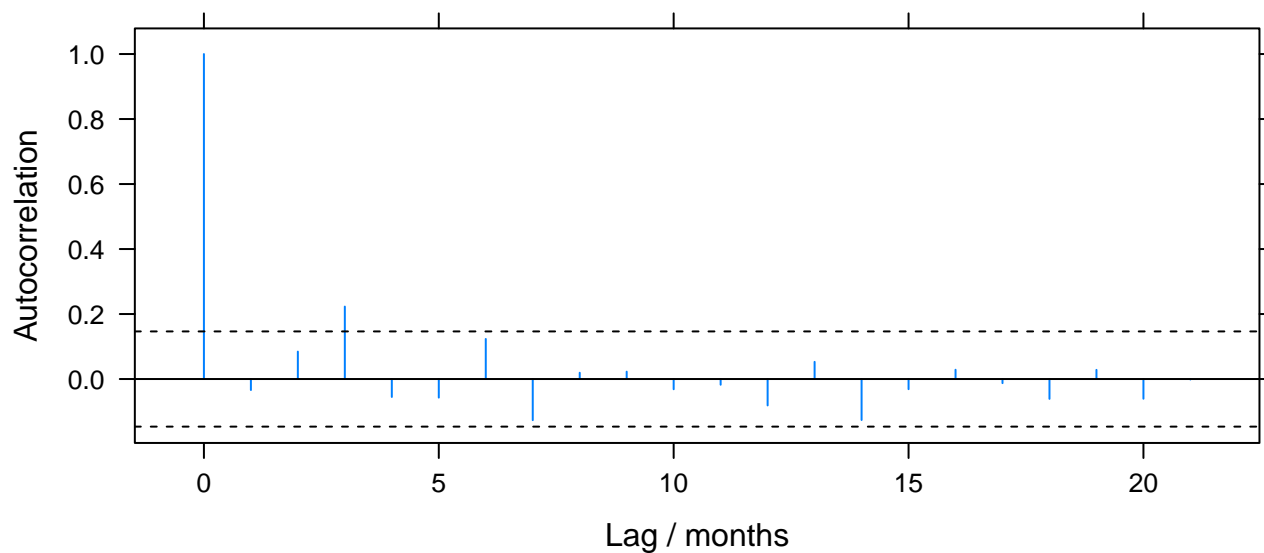

**Figure S34.** As Fig. S32, but for the AERONET AOD over Solar Village shown in Fig. 4.

### Partial correlogram (MODIS Angstrom exponent, Saudi Arabia)

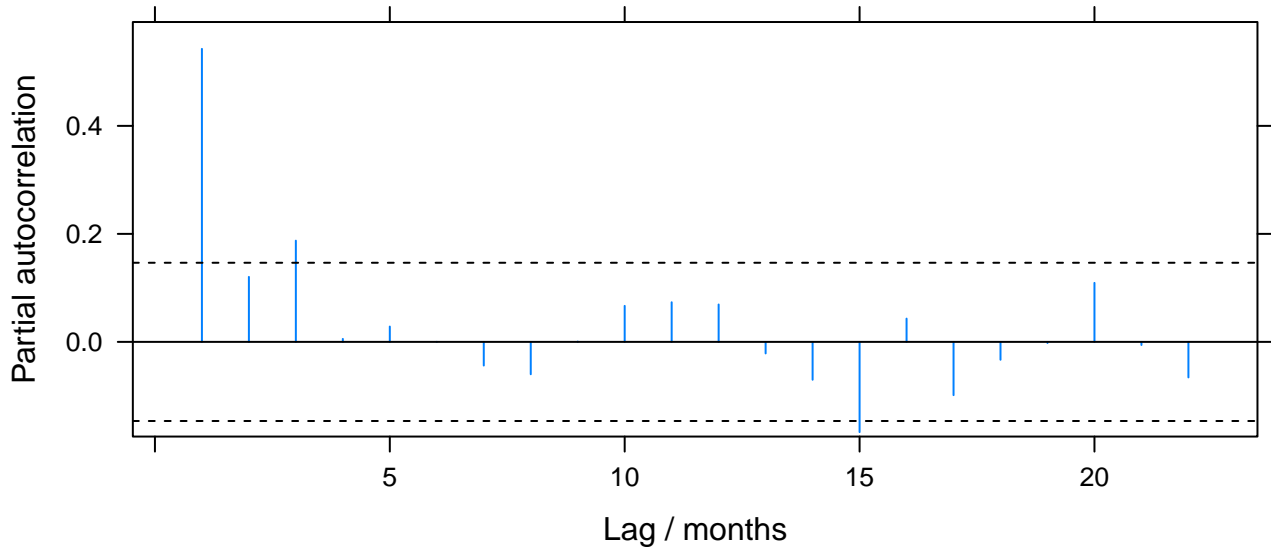

Figure S35. As Fig. S31, but for the MODIS Ångström exponent shown in Fig. 5.

### AR(1) residual correlogram (MODIS Angstrom exponent, Saudi Arabia)

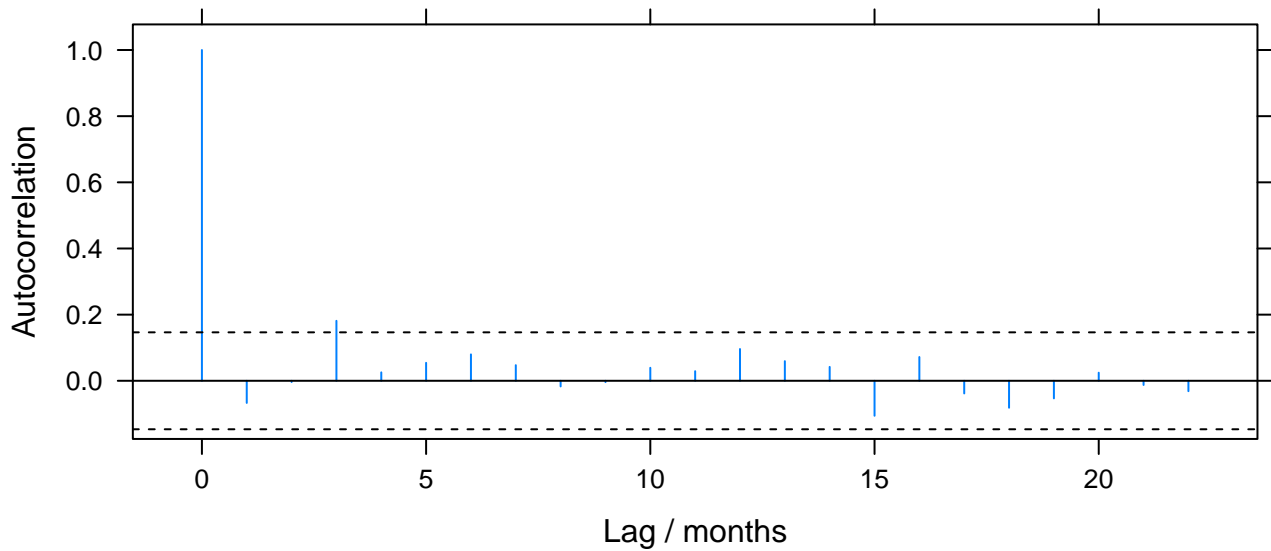

Figure S36. As Fig. S32, but for the MODIS Ångström exponent shown in Fig. 5.

### Partial correlogram (AERONET fine mode fraction, Solar Village)

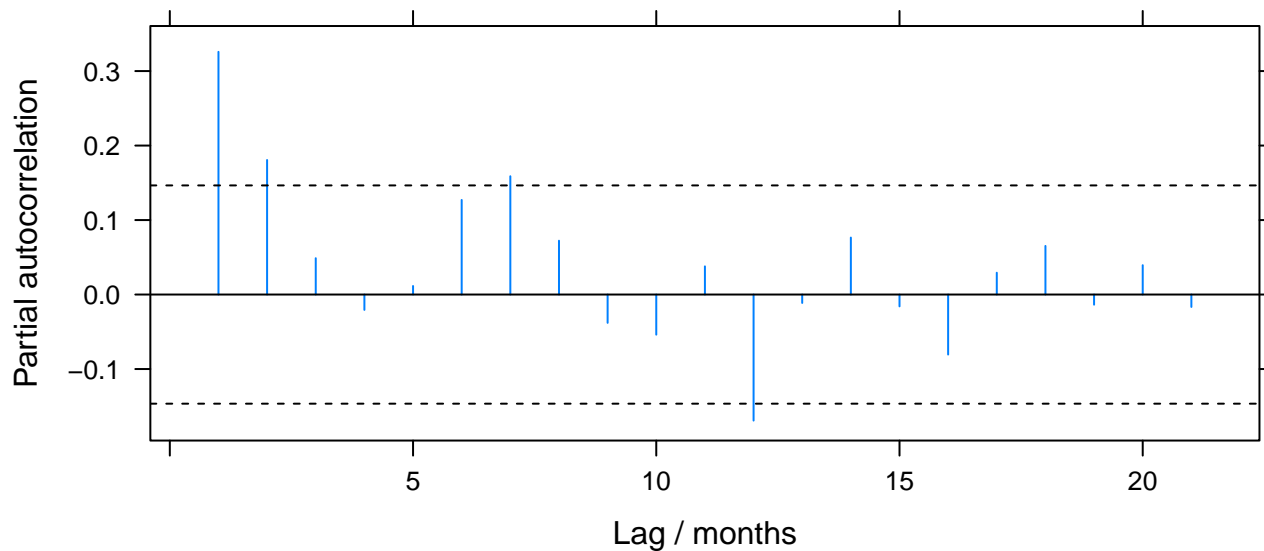

**Figure S37.** As Fig. S31, but for the AERONET fine mode fraction over Solar Village shown in Fig. 6.

### AR(1) residual correlogram (AERONET fine mode fraction, Solar Village)

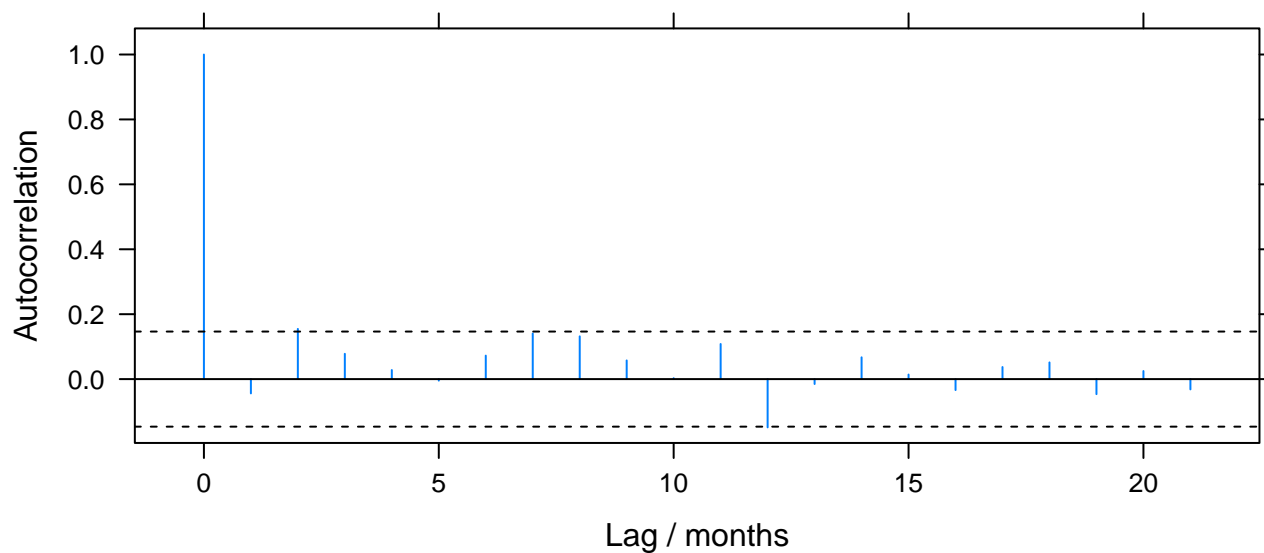

**Figure S38.** As Fig. S32, but for the AERONET fine mode fraction over Solar Village shown in Fig. 6.
